# Supplementary material
Source: PubMed Central journal article supplement (PMC8419104)
Supplement: NIHMS1716877-supplement-supplementary_figures_and_tables.pdf [file NIHMS1716877-supplement-supplementary_figures_and_tables.pdf]

## Supplementary Information

ARVib suppresses growth of advanced prostate cancer via inhibition  
of androgen receptor signaling

Liu, et al.

# Supplementary Figure 1

**A**

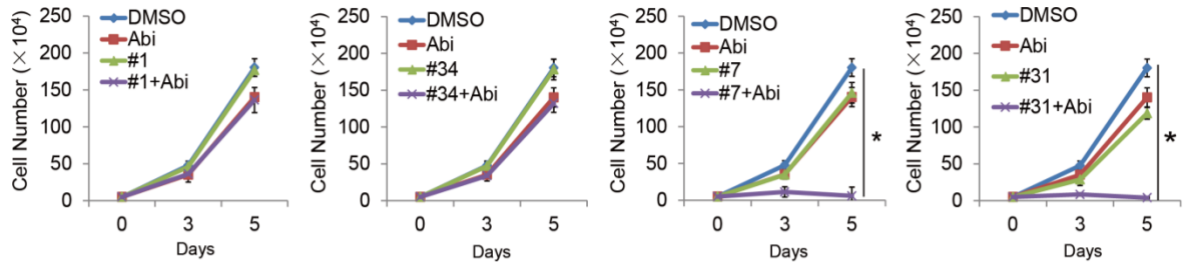

**B**

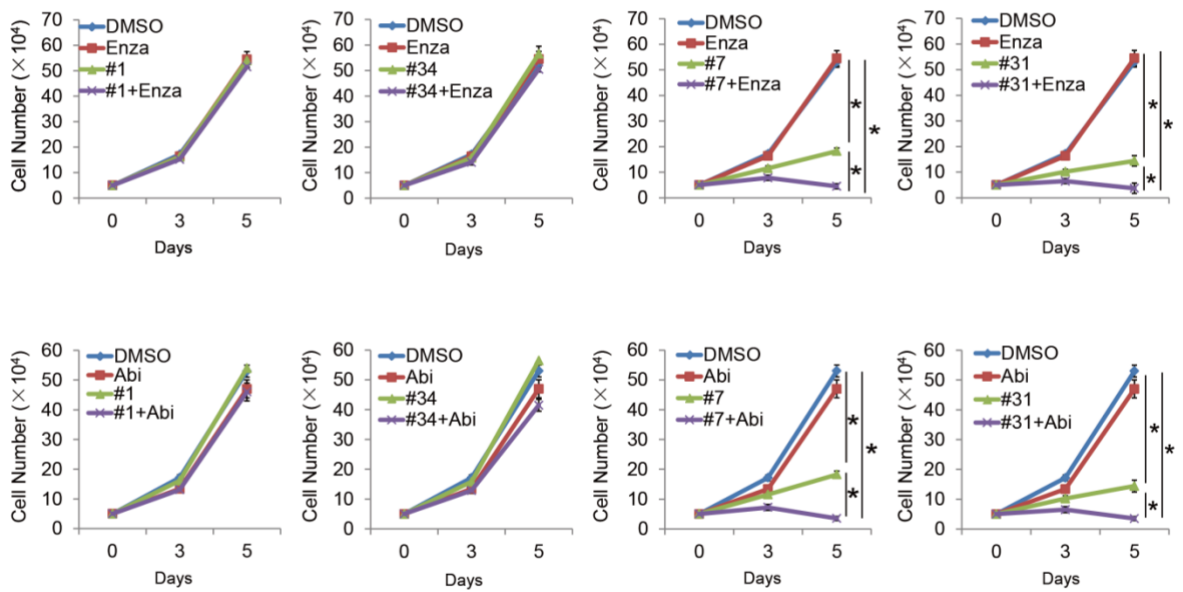

**C**

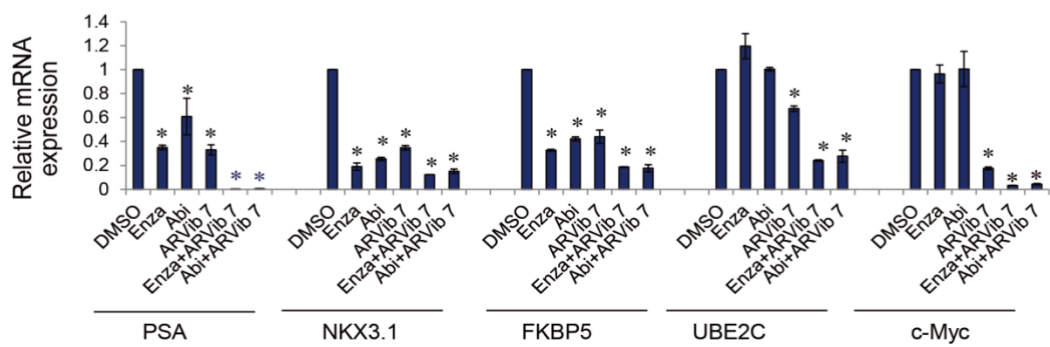

**Supplementary Figure 1. Identification of potent ARVib in drug resistant prostate cancer cells.** (A) CWR22Rv1 cells were treated with 0.25  $\mu$ M ARVib-1, ARVib-34, ARVib-7 or ARVib-31 in combination with 5 $\mu$ M abiraterone acetate for 3 days. Total cell numbers were determined at 0, 3 and 5 days. (B) C4-2B MDVR cells were treated with 0.25  $\mu$ M ARVib-1, ARVib-34, ARVib-7 or ARVib-31 in combination with 20  $\mu$ M enzalutamide or 5  $\mu$ M abiraterone acetate. Total cell numbers were determined at 0, 3 and 5 days. (C) C4-2B MDVR cells were treated with 0.25  $\mu$ M ARVib-7 with or without Enza/Abi for 5 days, total RNA was extracted and the mRNA expression of AR/AR-V7 target genes were examined by qRT-PCR. \*  $p < 0.05$ . Results are the mean of three independent experiments ( $\pm$ S.D.). Statistical analysis was performed using two tailed Student's t test.

# Supplementary Figure 2

A

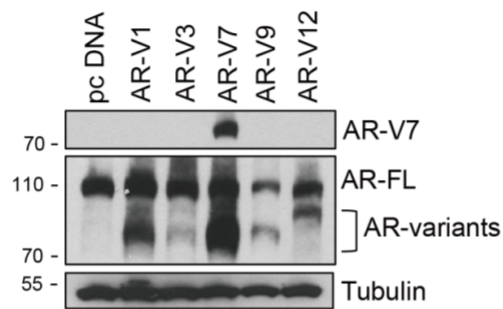

B

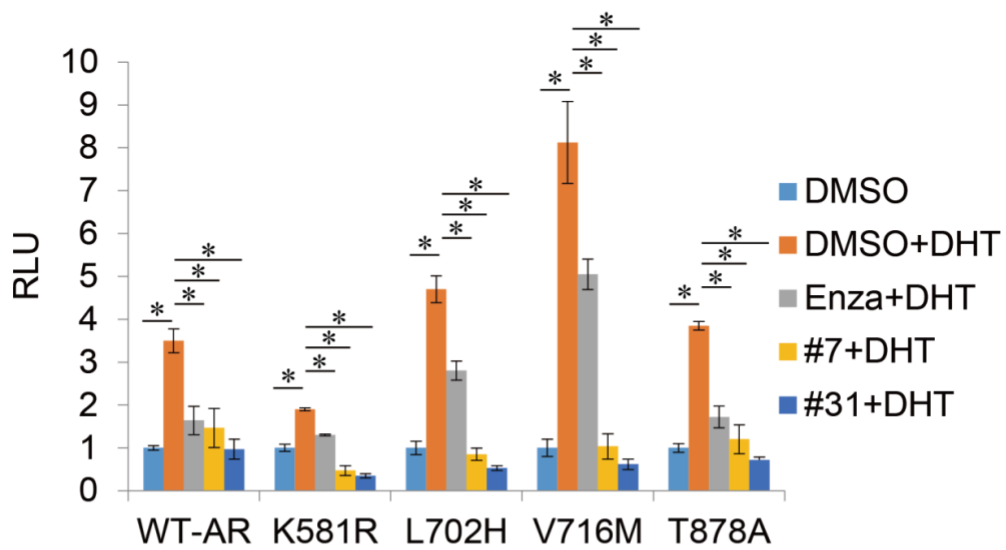

C

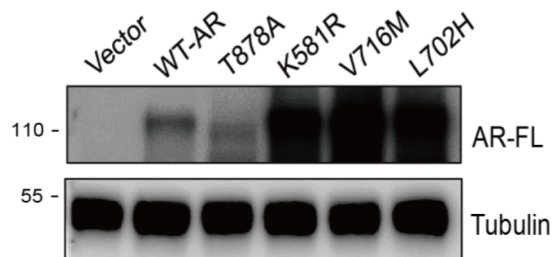

**Supplementary Figure 2. ARVib suppress AR variants and mutant AR activity.** (A) C4-2B cells were transiently transfected with pcDNA or different AR variants for 3 days, whole cell lysates were collected for western blot. (B) 293 cells were transiently transfected with vector, AR-V7, AR mutants plus PSA promoter luciferase plasmids in CS-FBS condition, and then treated with 20  $\mu$ M enzalutamide or 1  $\mu$ M ARVibs with 10 nM DHT for 16 hours. PSA luciferase activity was determined. (C) The AR mutants transfected in 293 cells were examined by western blot. \*  $p < 0.05$ . Results are the mean of three independent experiments ( $\pm$ S.D.).

## Supplementary Figure 3

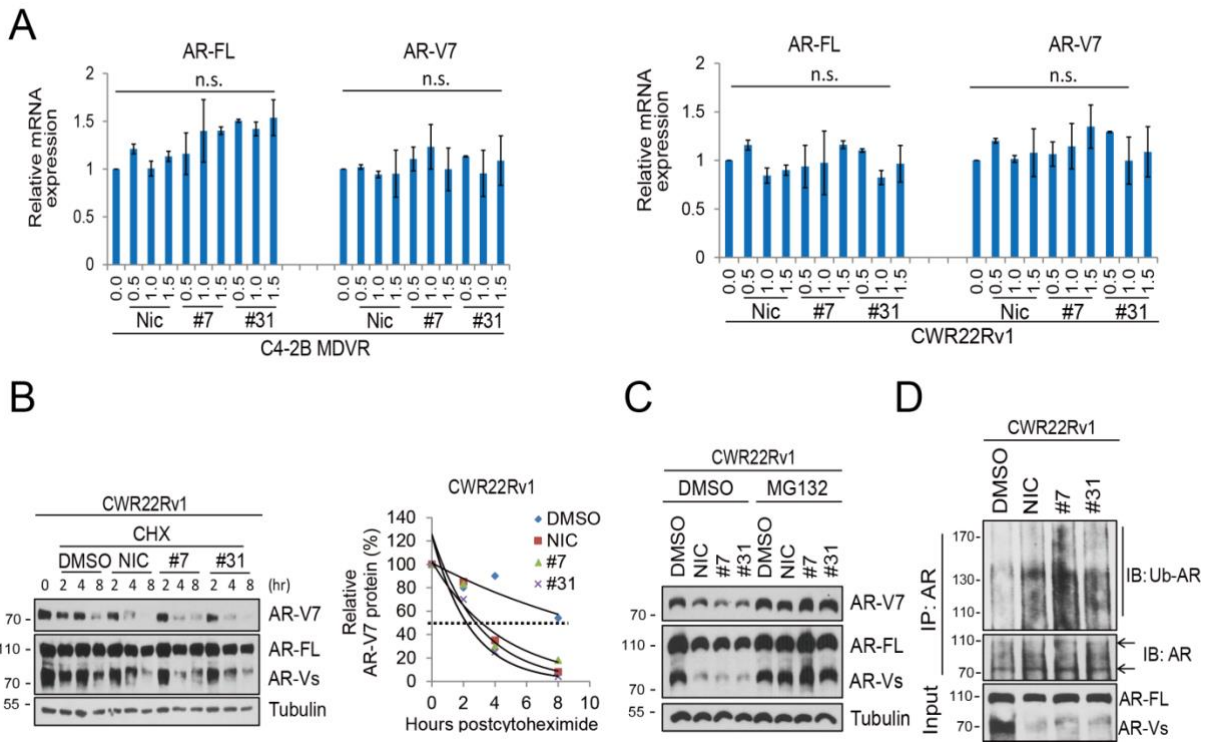

**Supplementary Figure 3. ARVib degrades AR/AR-V7 via regulation of the ubiquitin proteasome system.** (A) C4-2B MDVR and CWR22Rv1 cells were treated with different doses of ARVib 16 hours, total RNA was extracted and mRNA levels of AR-V7 and full-length AR were examined by real-time PCR. (B) CWR22Rv1 cells were treated with 50  $\mu\text{g}/\text{mL}$  cycloheximide with or without ARVib. After 0, 2, 4 and 8 hours, whole cell lysates were collected and subjected to western blot and the half-life of AR-V7 was calculated. (C) CWR22Rv1 cells were treated with DMSO or 1  $\mu\text{M}$  ARVib 16 hours and then treated with 5  $\mu\text{g}/\text{mL}$  MG132 for additional 6 hours. Whole cell lysates were collected and subjected to western blot. (D). CWR22Rv1 cells were treated with DMSO or 1  $\mu\text{M}$  ARVib 16 hours. Whole cell lysates were collected and immunoprecipitated with AR antibody and blotted with anti-Ub and AR antibodies.

# Supplementary Figure 4

**A**

|              | Genes  | ARVib-7 | ARVib-31 |
|--------------|--------|---------|----------|
| HSP70 FAMILY | HSPA1B | -2.5721 | -4.1687  |
|              | HSPA4  | -1.4239 | -1.6279  |
|              | HSPA14 | -1.2818 | -1.1737  |
|              | HSPA4L | -1.3108 | -1.2232  |

**B**

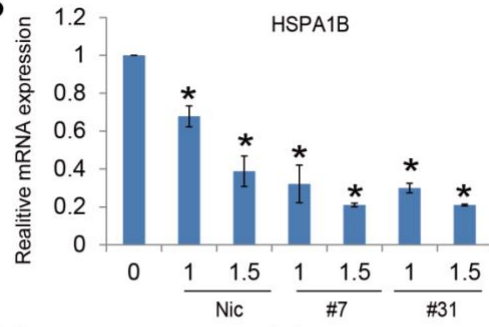

**C**

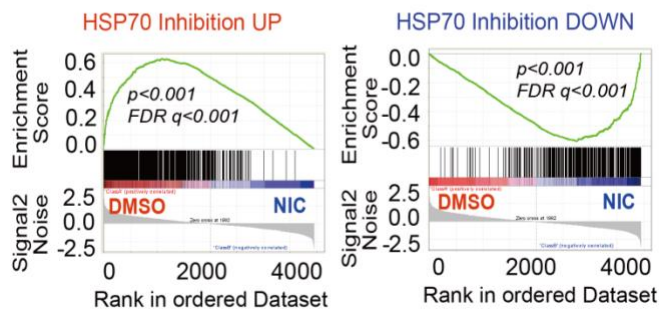

**D**

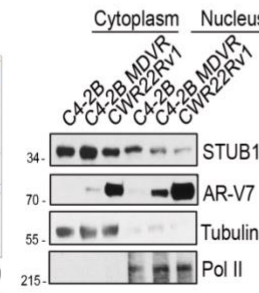

**E**

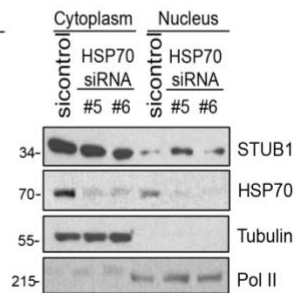

**F**

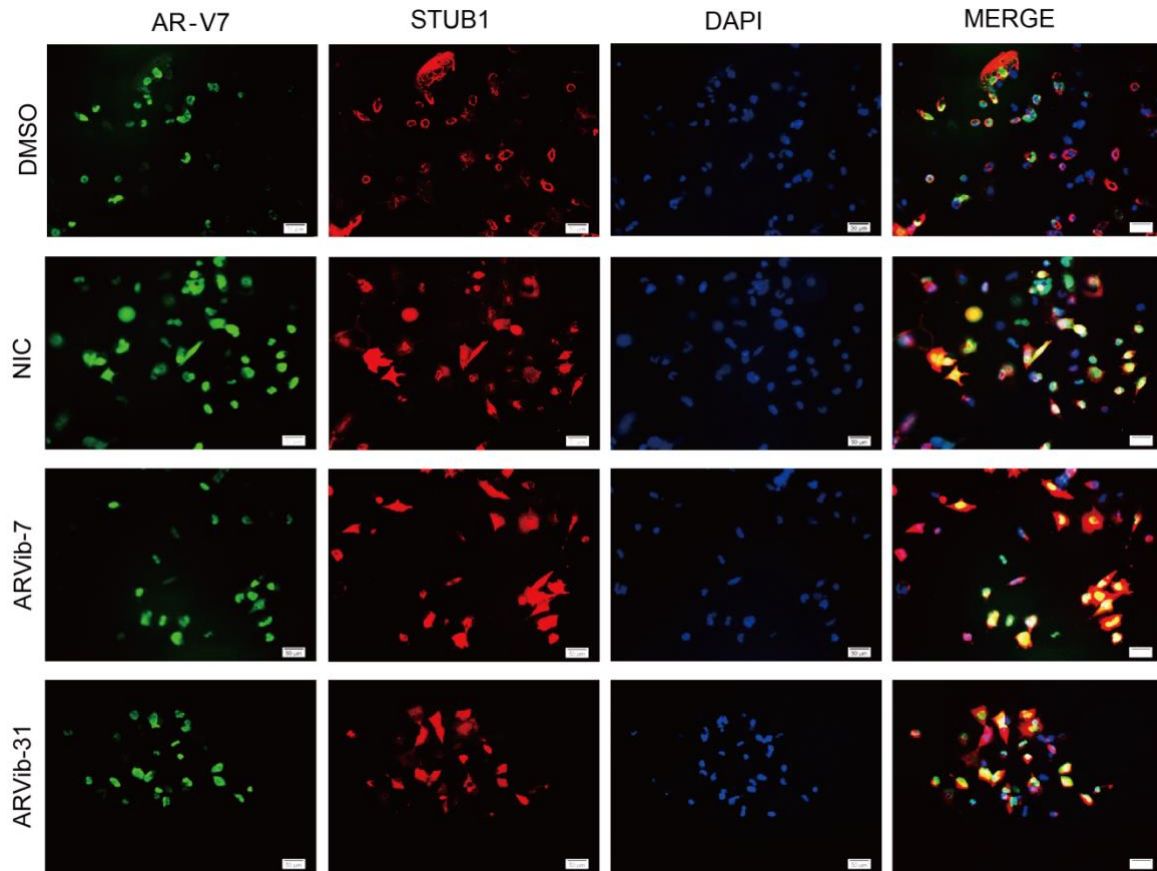

**Supplementary Figure 4. ARVib modulates the HSP70/STUB1 complex.** (A) HSP70 family member gene expression was suppressed by ARVib in C4-2B MDVR cells as demonstrated by RNA-seq data analysis. (B) C4-2B MDVR cells were treated with different doses of ARVib, total RNA was extracted and mRNA level of HSPA1B was examined by real-time PCR. \*  $p < 0.05$ . Results are the mean of three independent experiments ( $\pm$ S.D.). Statistical analysis was performed using two tailed Student's t test. (C) GSEA analysis reveals enrichment of the HSP70 inhibition signature in resistant cells treated with niclosamide. The signature was defined by genes with significant expression changes by HSP70 inhibition in prostate cancer cells. (D) Cytosolic and nuclear protein from C4-2B, C4-2B MDVR and CWR22Rv1 cells was extracted and subjected to western blot. (E) HSP70 was knocked down by two independent siRNA for 3 days in C4-2B MDVR cells, cytosolic and nuclear protein was extracted and subjected to western blot. (F) 293 cells were co-transfected with AR-V7, HSP70 and Flag-STUB1 for 3 days and then treated with DMSO or ARVib (1  $\mu$ M) and 5  $\mu$ M MG132 for 24 hours. AR-V7 and STUB1 were visualized by dual immunofluorescence staining.



## Supplementary Figure 5

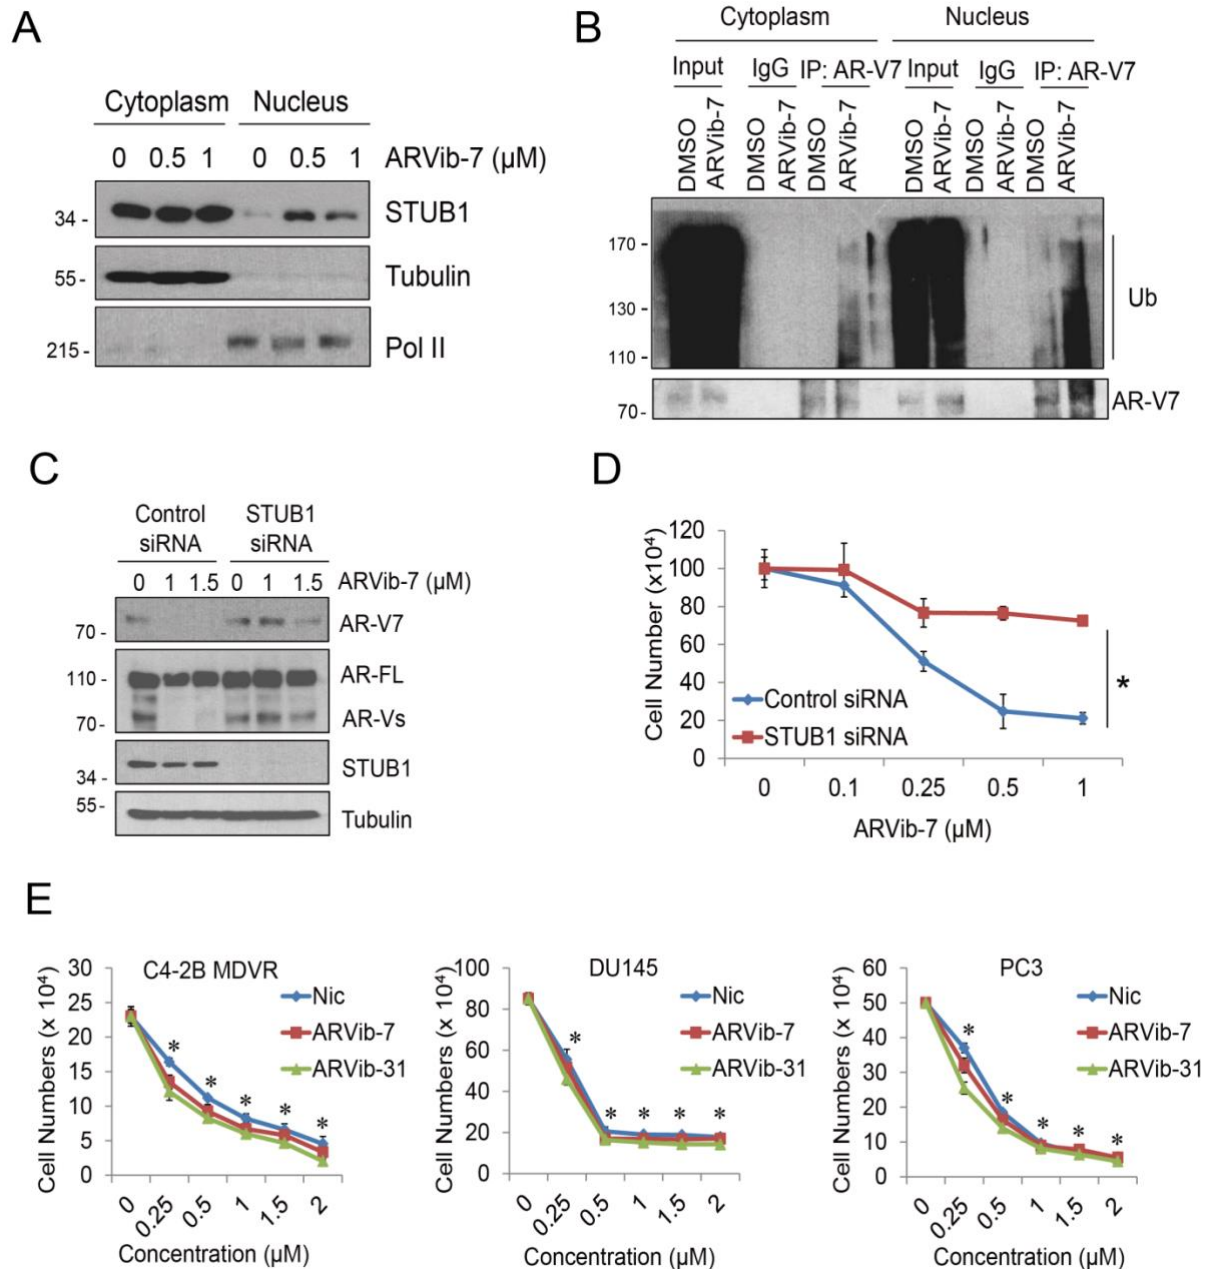

**Supplementary Figure 5. ARVib degrades AR-V7 through STUB1.** (A) C4-2B MDVR cells were treated with DMSO, 0.5 or 1.0  $\mu\text{M}$  ARVib-7 16 hours and 5  $\mu\text{M}$  MG132 for an additional 6 hours. Cytosolic and nuclear proteins were extracted and subjected to western blot. (B) C4-2B MDVR cells were treated with DMSO, 0.5 or 1.0  $\mu\text{M}$  ARVib-7 16 hours and 5  $\mu\text{M}$  MG132 for an additional 6 hours. Cytosolic and nuclear proteins were extracted and immunoprecipitated with AR-V7 antibody and blotted with anti-Ub and AR-V7 antibodies. (C) C4-2B MDVR cells were transiently transfected with STUB1 siRNA for 3 days and then

treated with different doses of ARVib-7 16 hours. Whole cell lysates were collected and subjected to western blot. **(D)** C4-2B MDVR cells were transiently transfected with STUB1 siRNA for 3 days and then treated with different doses of ARVib-7 for 3 days. Total cell numbers were determined. **(E)** C4-2B MDVR, DU145 and PC3 cells were treated with different dose of niclosamide, ARVib-7 or ARVib-31 for 3 days, total cell number were determined. \*  $p < 0.05$ . Results are the mean of three independent experiments ( $\pm$ S.D.).

# Supplementary Figure 6

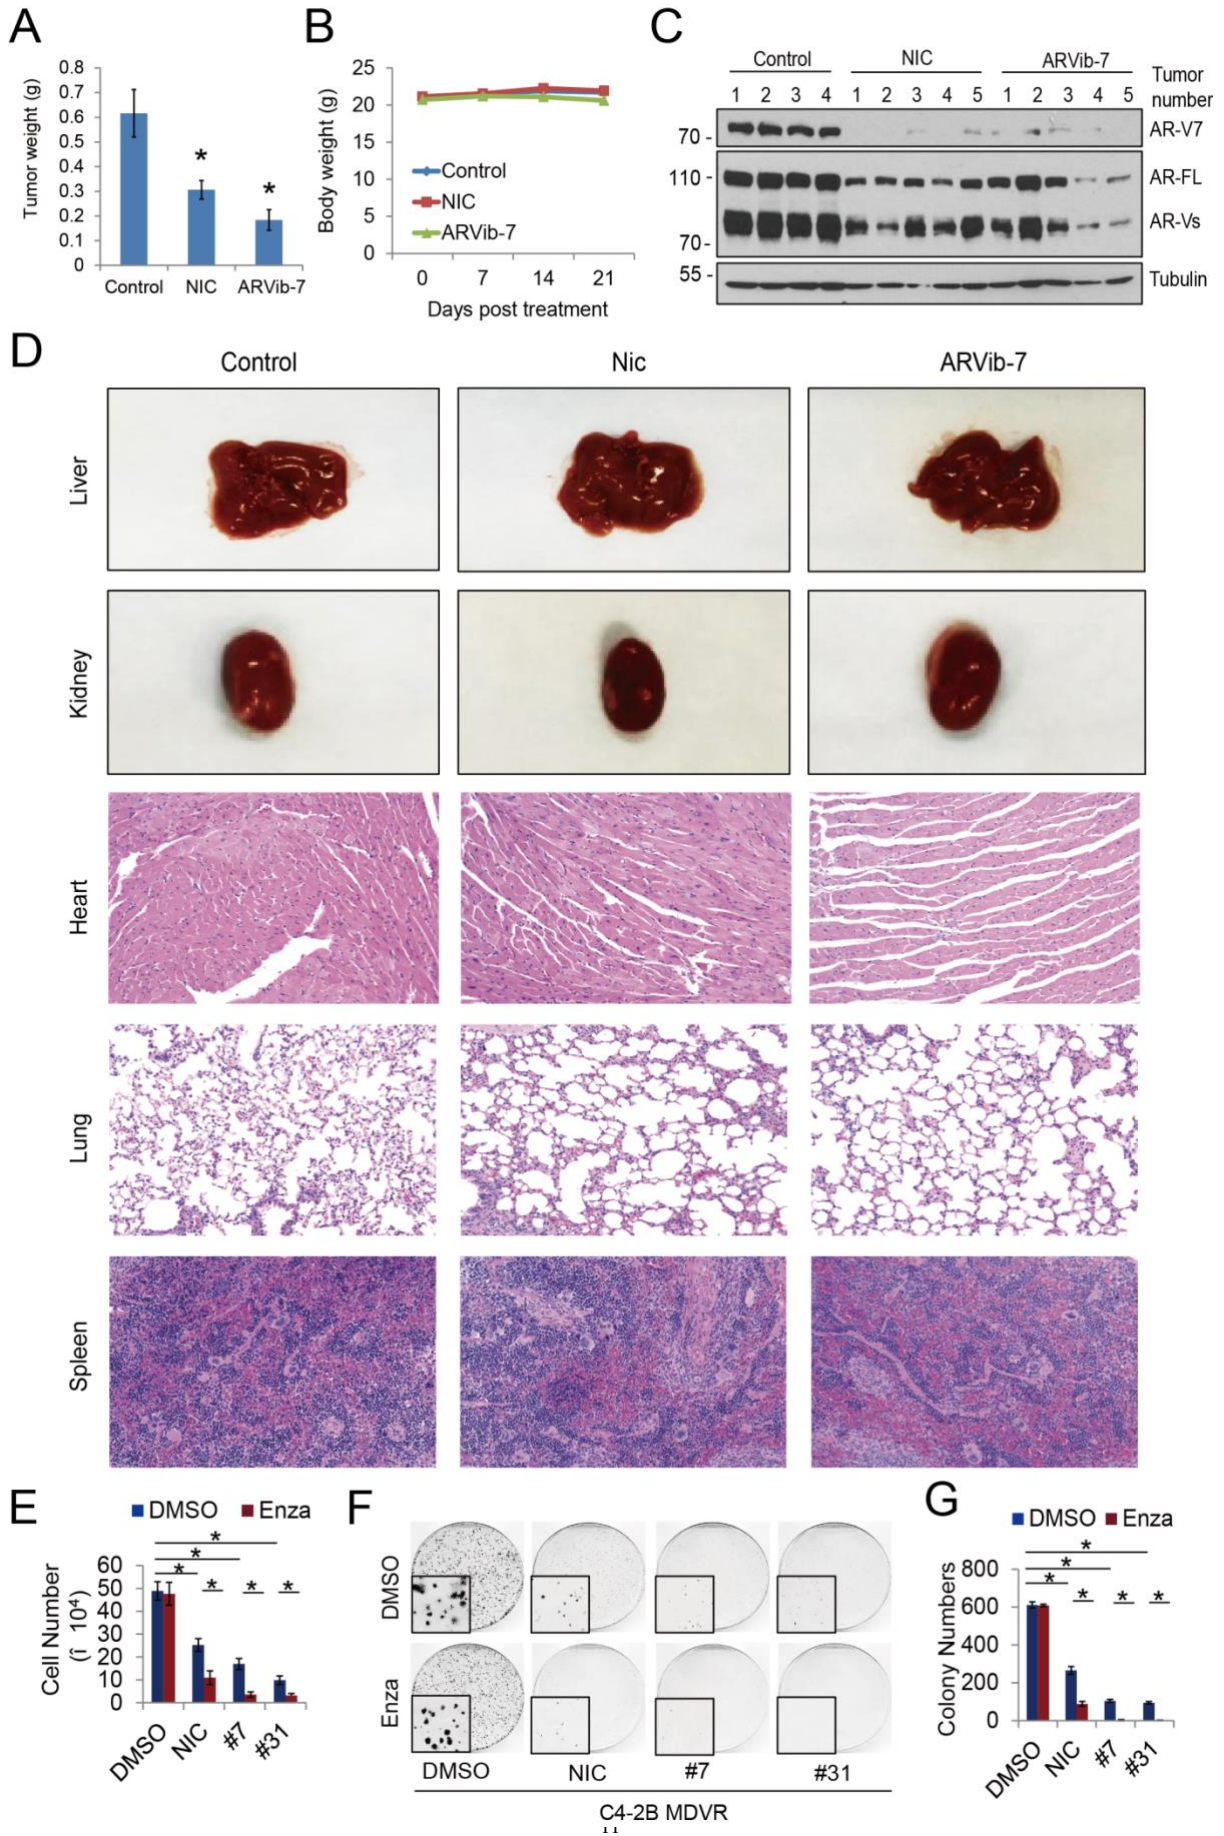

**Supplementary Figure 6. ARVib suppresses prostate tumor growth and improves enzalutamide treatment** (A) Mice bearing CWR22Rv1 xenografts were treated with vehicle control, niclosamide (25 mg/Kg i.p) or ARVib-7 (25 mg/Kg i.p) for 3 weeks (n=6). Tumors were collected and weighed. (B) Body weight was monitored twice per week. Data represent means  $\pm$ S.D. from 7 tumors per group. (C) Tumor protein from each group was extracted and subjected to western blot. (D) Liver and kidney were harvested from LuCaP 35CR xenograft mice and photographed. H&E staining of heart, lung and spleen was performed. (E) C4-2B MDVR cells were treated with 0.25  $\mu$ M niclosamide, ARVib-7 or ARVib-31 in combination with 20  $\mu$ M enzalutamide for 3 days. Total cell numbers were determined. (F-G) C4-2B MDVR cells were treated with 0.25  $\mu$ M niclosamide, ARVib-7 or ARVib-31 in combination with 20  $\mu$ M enzalutamide. Clonogenic assay was performed and the number of colonies was determined. \*  $p < 0.05$ . Results are the mean of three independent experiments ( $\pm$ S.D.). Statistical analysis was performed using two tailed Student's t test.

**Supplementary Table 1.** Up regulated gene sets in ARVib treated C4-2B MDVR cells

| <b>NAME</b>                                                              | <b>NES</b> | <b>NOM p-value</b> |
|--------------------------------------------------------------------------|------------|--------------------|
| HALLMARK_P53_PATHWAY                                                     | 2.4256454  | 0.0000             |
| HALLMARK_INFLAMMATORY_RESPONSE                                           | 2.3338137  | 0.0000             |
| HALLMARK_HEME_METABOLISM                                                 | 1.963814   | 0.0000             |
| HALLMARK_IL6_JAK_STAT3_SIGNALING                                         | 1.9456544  | 0.0020             |
| HALLMARK_UNFOLDED_PROTEIN_RESPONSE                                       | 1.9187012  | 0.0000             |
| HALLMARK_INTERFERON_GAMMA_RESPONSE                                       | 1.9065014  | 0.0020             |
| HALLMARK_CHOLESTEROL_HOMEOSTASIS                                         | 1.9041417  | 0.0040             |
| HALLMARK_COAGULATION                                                     | 1.8288968  | 0.0100             |
| HALLMARK_HYPOXIA                                                         | 1.8065017  | 0.0000             |
| HALLMARK_APOPTOSIS                                                       | 1.7748673  | 0.0000             |
| KEGG_RIBOSOME                                                            | 2.4177873  | 0.0000             |
| KEGG_CYTOKINE_CYTOKINE_RECEPTOR_INTERACTION                              | 2.0938303  | 0.0019             |
| KEGG_SNARE_INTERACTIONS_IN_VESICULAR_TRANSPORT                           | 1.9443306  | 0.0021             |
| KEGG_LYSOSOME                                                            | 1.7147795  | 0.0061             |
| KEGG_NATURAL_KILLER_CELL_MEDIATED_CYTOTOXICITY                           | 1.6509591  | 0.0262             |
| KEGG_ERBB_SIGNALING_PATHWAY                                              | 1.5469512  | 0.0346             |
| KEGG_CELL_ADHESION_MOLECULES_CAMS                                        | 1.5248582  | 0.0316             |
| KEGG_LEUKOCYTE_TRANSENDOTHELIAL_MIGRATION                                | 1.4979825  | 0.0481             |
| <br>                                                                     |            |                    |
| REACTOME_PEPTIDE_CHAIN_ELONGATION                                        | 2.3380086  | 0.0000             |
| REACTOME_SRP_DEPENDENT_COTRANSLATIONAL_PROTEIN_T<br>ARGETING_TO_MEMBRANE | 2.1720405  | 0.0000             |
| REACTOME_PHASE1_FUNCTIONALIZATION_OF_COMPOUNDS                           | 2.0089476  | 0.0042             |
| REACTOME_SIGNALING_BY_ERBB4                                              | 1.8289428  | 0.0019             |

|                                                                                   |           |        |
|-----------------------------------------------------------------------------------|-----------|--------|
| REACTOME_PI3K_EVENTS_IN_ERBB2_SIGNALING                                           | 1.8224328 | 0.0157 |
| REACTOME_UNFOLDED_PROTEIN_RESPONSE                                                | 1.8064979 | 0.0021 |
| REACTOME_3_UTR_MEDIATED_TRANSLATIONAL_REGULATION                                  | 1.689577  | 0.0061 |
| REACTOME_CYTOSOLIC_TRNA_AMINOACYLATION                                            | 1.6864245 | 0.0177 |
| REACTOME_IMMUNOREGULATORY_INTERACTIONS_BETWEEN_A_LYMPHOID_AND_A_NON_LYMPHOID_CELL | 1.6817012 | 0.0227 |
| REACTOME_TRANS_GOLGI_NETWORK_VESICLE_BUDDING                                      | 1.6677707 | 0.0167 |
| REACTOME_PI3K_EVENTS_IN_ERBB4_SIGNALING                                           | 1.6616333 | 0.0283 |
| REACTOME_PERK_REGULATED_GENE_EXPRESSION                                           | 1.6543653 | 0.0236 |
| REACTOME_INTERFERON_ALPHA_BETA_SIGNALING                                          | 1.6478027 | 0.0115 |
| REACTOME_INTERFERON_GAMMA_SIGNALING                                               | 1.6074164 | 0.0300 |
| REACTOME_TRANSLATION                                                              | 1.6031276 | 0.0125 |
| REACTOME_CLASS_B_2_SECRETIN_FAMILY_RECEPTORS                                      | 1.5839899 | 0.0211 |
| REACTOME_DIABETES_PATHWAYS                                                        | 1.5834861 | 0.0106 |
| REACTOME_SIGNALING_BY_SCF_KIT                                                     | 1.5730137 | 0.0479 |
| REACTOME_GAB1_SIGNALOSOME                                                         | 1.5647377 | 0.0439 |
| REACTOME_ACTIVATION_OF_GENES_BY_ATF4                                              | 1.5551846 | 0.0494 |
| REACTOME_TRANSPORT_TO_THE_GOLGI_AND_SUBSEQUENT_MODIFICATION                       | 1.5487257 | 0.0391 |
| REACTOME_GPCR_LIGAND_BINDING                                                      | 1.5442389 | 0.0224 |
| REACTOME_NONSENSE_MEDIATED_DECAY_ENHANCED_BY_THE_EXON_JUNCTION_COMPLEX            | 1.5106287 | 0.0217 |
| REACTOME_SPHINGOLIPID_METABOLISM                                                  | 1.4987527 | 0.0414 |
| REACTOME_MEMBRANE_TRAFFICKING                                                     | 1.4918388 | 0.0391 |
| REACTOME_ADAPTIVE_IMMUNE_SYSTEM                                                   | 1.3863758 | 0.0158 |
| REACTOME_IMMUNE_SYSTEM                                                            | 1.2900531 | 0.0498 |

---

**Supplementary Table 2.** Down regulated gene sets in ARVib treated C4-2B MDVR cells

---

| <b>NAME</b>                                  | <b>NES</b> | <b>NOM p-value</b> |
|----------------------------------------------|------------|--------------------|
| HALLMARK_E2F_TARGETS                         | -3.6501343 | 0.0000             |
| HALLMARK_G2M_CHECKPOINT                      | -3.453412  | 0.0000             |
| HALLMARK_MYC_TARGETS_V2                      | -3.333848  | 0.0000             |
| HALLMARK_MYC_TARGETS_V1                      | -3.0630283 | 0.0000             |
| HALLMARK_ANDROGEN_RESPONSE                   | -2.3942077 | 0.0000             |
| HALLMARK_MITOTIC_SPINDLE                     | -1.973954  | 0.0000             |
|                                              |            |                    |
| KEGG_DNA_REPLICATION                         | -2.8318264 | 0.0000             |
| KEGG_CELL_CYCLE                              | -2.6476054 | 0.0000             |
| KEGG_SPLICEOSOME                             | -2.4567487 | 0.0000             |
| KEGG_SYSTEMIC_LUPUS_ERYTHEMATOSUS            | -2.2802567 | 0.0000             |
| KEGG_PURINE_METABOLISM                       | -2.103461  | 0.0000             |
| KEGG_BASE_EXCISION_REPAIR                    | -2.075307  | 0.0000             |
| KEGG_HOMOLOGOUS_RECOMBINATION                | -1.9235047 | 0.0042             |
| KEGG_PYRIMIDINE_METABOLISM                   | -1.8924199 | 0.0020             |
| KEGG_PROGESTERONE_MEDIATED_OOCYTE_MATURATION | -1.7437338 | 0.0064             |
| KEGG_DRUG_METABOLISM_CYTOCHROME_P450         | -1.704726  | 0.0155             |
| KEGG_NEUROACTIVE_LIGAND_RECEPTOR_INTERACTION | -1.6898865 | 0.0061             |
| KEGG_NUCLEOTIDE_EXCISION_REPAIR              | -1.6718376 | 0.0153             |
| KEGG_OOCYTE_MEIOSIS                          | -1.6659161 | 0.0100             |

---

|                                                              |            |        |
|--------------------------------------------------------------|------------|--------|
| REACTOME_G1_S_TRANSITION                                     | -3.429591  | 0.0000 |
| REACTOME_CELL_CYCLE                                          | -3.3122485 | 0.0000 |
| REACTOME_DNA_REPLICATION                                     | -3.3013022 | 0.0000 |
| REACTOME_S_PHASE                                             | -3.1981616 | 0.0000 |
| REACTOME_CELL_CYCLE_MITOTIC                                  | -3.1599967 | 0.0000 |
| REACTOME_MITOTIC_G1_G1_S_PHASES                              | -3.1499    | 0.0000 |
| REACTOME_MITOTIC_M_M_G1_PHASES                               | -3.1389034 | 0.0000 |
| REACTOME_DNA_STRAND_ELONGATION                               | -3.0934153 | 0.0000 |
| REACTOME_ACTIVATION_OF_THE_PRE_REPLICATIVE_COMPLEX           | -3.0819383 | 0.0000 |
| REACTOME_E2F_MEDIATED_REGULATION_OF_DNA_REPLICATION          | -3.0707061 | 0.0000 |
| REACTOME_M_G1_TRANSITION                                     | -3.0217013 | 0.0000 |
| REACTOME_G1_S_SPECIFIC_TRANSCRIPTION                         | -3.0041122 | 0.0000 |
| REACTOME_G2_M_CHECKPOINTS                                    | -2.9958324 | 0.0000 |
| REACTOME_SYNTHESIS_OF_DNA                                    | -2.9766903 | 0.0000 |
| REACTOME_ACTIVATION_OF_ATR_IN_RESPONSE_TO_REPLICATION_STRESS | -2.975267  | 0.0000 |
| REACTOME_CHROMOSOME_MAINTENANCE                              | -2.908514  | 0.0000 |
| REACTOME_TELOMERE_MAINTENANCE                                | -2.894609  | 0.0000 |
| REACTOME_MRNA_PROCESSING                                     | -2.8396115 | 0.0000 |
| REACTOME_PROCESSING_OF_CAPPED_INTRON_CONTAINING_PRE_MRNA     | -2.807475  | 0.0000 |
| REACTOME_EXTENSION_OF_TELOMERES                              | -2.7029057 | 0.0000 |
| REACTOME_CELL_CYCLE_CHECKPOINTS                              | -2.6329043 | 0.0000 |
| REACTOME_MEIOTIC_RECOMBINATION                               | -2.6324575 | 0.0000 |
| REACTOME_G0_AND_EARLY_G1                                     | -2.590677  | 0.0000 |
| REACTOME_MRNA_SPLICING                                       | -2.5731232 | 0.0000 |



|                                                                           |            |        |
|---------------------------------------------------------------------------|------------|--------|
| REACTOME_TRANSCRIPTION                                                    | -2.5457945 | 0.0000 |
| REACTOME_ASSEMBLY_OF_THE_PRE_REPLICATIVE_COMPLEX                          | -2.5291214 | 0.0000 |
| REACTOME_MEIOSIS                                                          | -2.5270026 | 0.0000 |
| REACTOME_DEPOSITION_OF_NEW_CENPA_CONTAINING_NUCLEOSOMES_AT_THE_CENTROMERE | -2.4929788 | 0.0000 |
| REACTOME_LAGGING_STRAND_SYNTHESIS                                         | -2.4711041 | 0.0000 |
| REACTOME_RNA_POL_I_RNA_POL_III_AND_MITOCHONDRIAL_TRANSCRIPTION            | -2.4568815 | 0.0000 |
| REACTOME_MITOTIC_PROMETAPHASE                                             | -2.4279478 | 0.0000 |
| REACTOME_METABOLISM_OF_NON_CODING_RNA                                     | -2.4173305 | 0.0000 |
| REACTOME_RNA_POL_I_PROMOTER_OPENING                                       | -2.3970208 | 0.0000 |
| REACTOME_TRANSPORT_OF_MATURE_TRANSCRIPT_TO_CYTOPLASM                      | -2.3758795 | 0.0000 |
| REACTOME_RNA_POL_I_TRANSCRIPTION                                          | -2.357174  | 0.0000 |
| REACTOME_ORC1_REMOVAL_FROM_CHROMATIN                                      | -2.3454108 | 0.0000 |
| REACTOME_PACKAGING_OF_TELOMERE_ENDS                                       | -2.2868698 | 0.0021 |
| REACTOME_DNA_REPAIR                                                       | -2.2341654 | 0.0000 |
| REACTOME_AMYLOIDS                                                         | -2.225185  | 0.0000 |
| REACTOME_MRNA_SPLICING_MINOR_PATHWAY                                      | -2.1975927 | 0.0000 |
| REACTOME_TRANSPORT_OF_MATURE_MRNA_DERIVED_FROM_AN_INTRONLESS_TRANSCRIPT   | -2.1387322 | 0.0000 |
| REACTOME_NEP_NS2_INTERACTS_WITH_THE_CELLULAR_EXPORT_MACHINERY             | -2.1308575 | 0.0000 |
| REACTOME_CLEAVAGE_OF_GROWING_TRANSCRIPT_IN_THE_TERMINATION_REGION         | -2.1239073 | 0.0000 |
| REACTOME_RNA_POL_II_TRANSCRIPTION                                         | -2.11891   | 0.0000 |
| REACTOME_FORMATION_OF_TUBULIN_FOLDING_INTERMEDIATES_BY_CCT_TRIC           | -2.1029038 | 0.0020 |
| REACTOME_MEIOTIC_SYNAPSIS                                                 | -2.0990524 | 0.0000 |
| REACTOME_TRANSPORT_OF_RIBONUCLEOPROTEINS_INTO_THE_HOST_NUCLEUS            | -2.0971913 | 0.0000 |

|                                                                                |            |        |
|--------------------------------------------------------------------------------|------------|--------|
| REACTOME_GLUCOSE_TRANSPORT                                                     | -2.0636134 | 0.0000 |
| REACTOME_PREFOLDIN_MEDIATED_TRANSFER_OF_SUBSTRATE_TO_CCT_TRIC                  | -2.0607743 | 0.0019 |
| REACTOME_METABOLISM_OF_NUCLEOTIDES                                             | -2.0285134 | 0.0000 |
| REACTOME_REGULATION_OF_MITOTIC_CELL_CYCLE                                      | -2.027396  | 0.0020 |
| REACTOME_REGULATION_OF_GLUCOKINASE_BY_GLUCOKINASE_REGULATORY_PROTEIN           | -2.0235674 | 0.0000 |
| REACTOME_MITOTIC_G2_M_PHASES                                                   | -1.9888797 | 0.0020 |
| REACTOME_HIV_LIFE_CYCLE                                                        | -1.9668924 | 0.0000 |
| REACTOME_CYCLIN_E_ASSOCIATED_EVENTS_DURING_G1_S_TRANSITION                     | -1.9609337 | 0.0000 |
| REACTOME_PURINE_METABOLISM                                                     | -1.9537992 | 0.0021 |
| REACTOME_INTERACTIONS_OF_VPR_WITH_HOST_CELLULAR_PROTEINS                       | -1.9461582 | 0.0083 |
| REACTOME_DOUBLE_STRAND_BREAK_REPAIR                                            | -1.9189279 | 0.0019 |
| REACTOME_MRNA_3_END_PROCESSING                                                 | -1.905243  | 0.0041 |
| REACTOME_LATE_PHASE_OF_HIV_LIFE_CYCLE                                          | -1.8351958 | 0.0000 |
| REACTOME_GLOBAL_GENOMIC_NER_GG_NER                                             | -1.7530818 | 0.0181 |
| REACTOME_TRANSCRIPTION_COUPLED_NER_TC_NER                                      | -1.747458  | 0.0157 |
| REACTOME_GLYCOLYSIS                                                            | -1.7444582 | 0.0115 |
| REACTOME_RNA_POL_II_TRANSCRIPTION_PRE_INITIATION_AND_PROMOTER_OPENING          | -1.7242773 | 0.0142 |
| REACTOME_PROCESSING_OF_CAPPED_INTRONLESS_PRE_MRNA                              | -1.7199014 | 0.0080 |
| REACTOME_CDT1_ASSOCIATION_WITH_THE_CDC6_ORC_ORIGIN_COMPLEX                     | -1.6763219 | 0.0283 |
| REACTOME_RNA_POL_III_TRANSCRIPTION                                             | -1.6581949 | 0.0060 |
| REACTOME_FACTORS_INVOLVED_IN_MEGAKARYOCYTE_DEVELOPMENT_AND_PLATELET_PRODUCTION | -1.5879005 | 0.0242 |
| REACTOME_HIV_INFECTION                                                         | -1.5503463 | 0.0137 |
| REACTOME_ANTIVIRAL_MECHANISM_BY_IFN_STIMULATED_GENES                           | -1.5242358 | 0.0297 |

|                                                                   |            |        |
|-------------------------------------------------------------------|------------|--------|
| REACTOME_METABOLISM_OF_RNA                                        | -1.4837075 | 0.0121 |
| REACTOME_RECRUITMENT_OF_MITOTIC_CENTROSOME_PROTEINS_AND_COMPLEXES | -1.4833018 | 0.0363 |
| REACTOME_HOST_INTERACTIONS_OF_HIV_FACTORS                         | -1.4764512 | 0.0394 |

---

Primer list for the qRT-PCR

|                   | Forward                | Reverse                   |
|-------------------|------------------------|---------------------------|
| AR-V7             | AACAGAAGTACCTGTGCGCC   | TCAGGGTCTGGTCATTTTGA      |
| AR-FL             | AAGCCAGAGCTGTGCAGATGA  | TGTCCTGCAGCCACTGGTTC      |
| HSP70<br>(HSPA1B) | TGGACTGTTGGGACTCAAGGAC | GGAACGAAACACCCTTACAGTATCA |
| KLK2              | CAACATCTGGAGGGGAAAGGG  | AGGCCAAGTGATGCCAGAAC      |
| KLK3              | GCCCTGCCCGAAAGG        | GATCCACTTCCGGTAATGCA      |
| FKBP5             | GGGAAGATAGTGTCTGGTTAG  | GCAGTCTTGCAGCCTTATTC      |
| NKX3-1            | CCGAGACGCTGGCAGAGACC   | GCTTAGGGGTTTGGGGAAG       |
| UBE2C             | TGGTCTGCCCTGTATGATGT   | AAAAGCTGTGGG GTTTTTCC     |
| Myc               | TGAGGAGACACCGCCAC      | CAACATCGATTTCTTCCTCATC    |
| ACTIN             | AGAACTGGCCCTTCTTGGAGG  | GTTTTTATGTTCTCTATGGG      |
